# Supplementary material
Source: publisher figshare collection journal article supplement (https://tandf.figshare.com/ndownloader/files/14816678)
Supplement: Supplementary file 1 [file 14816678]

Supplemental Material


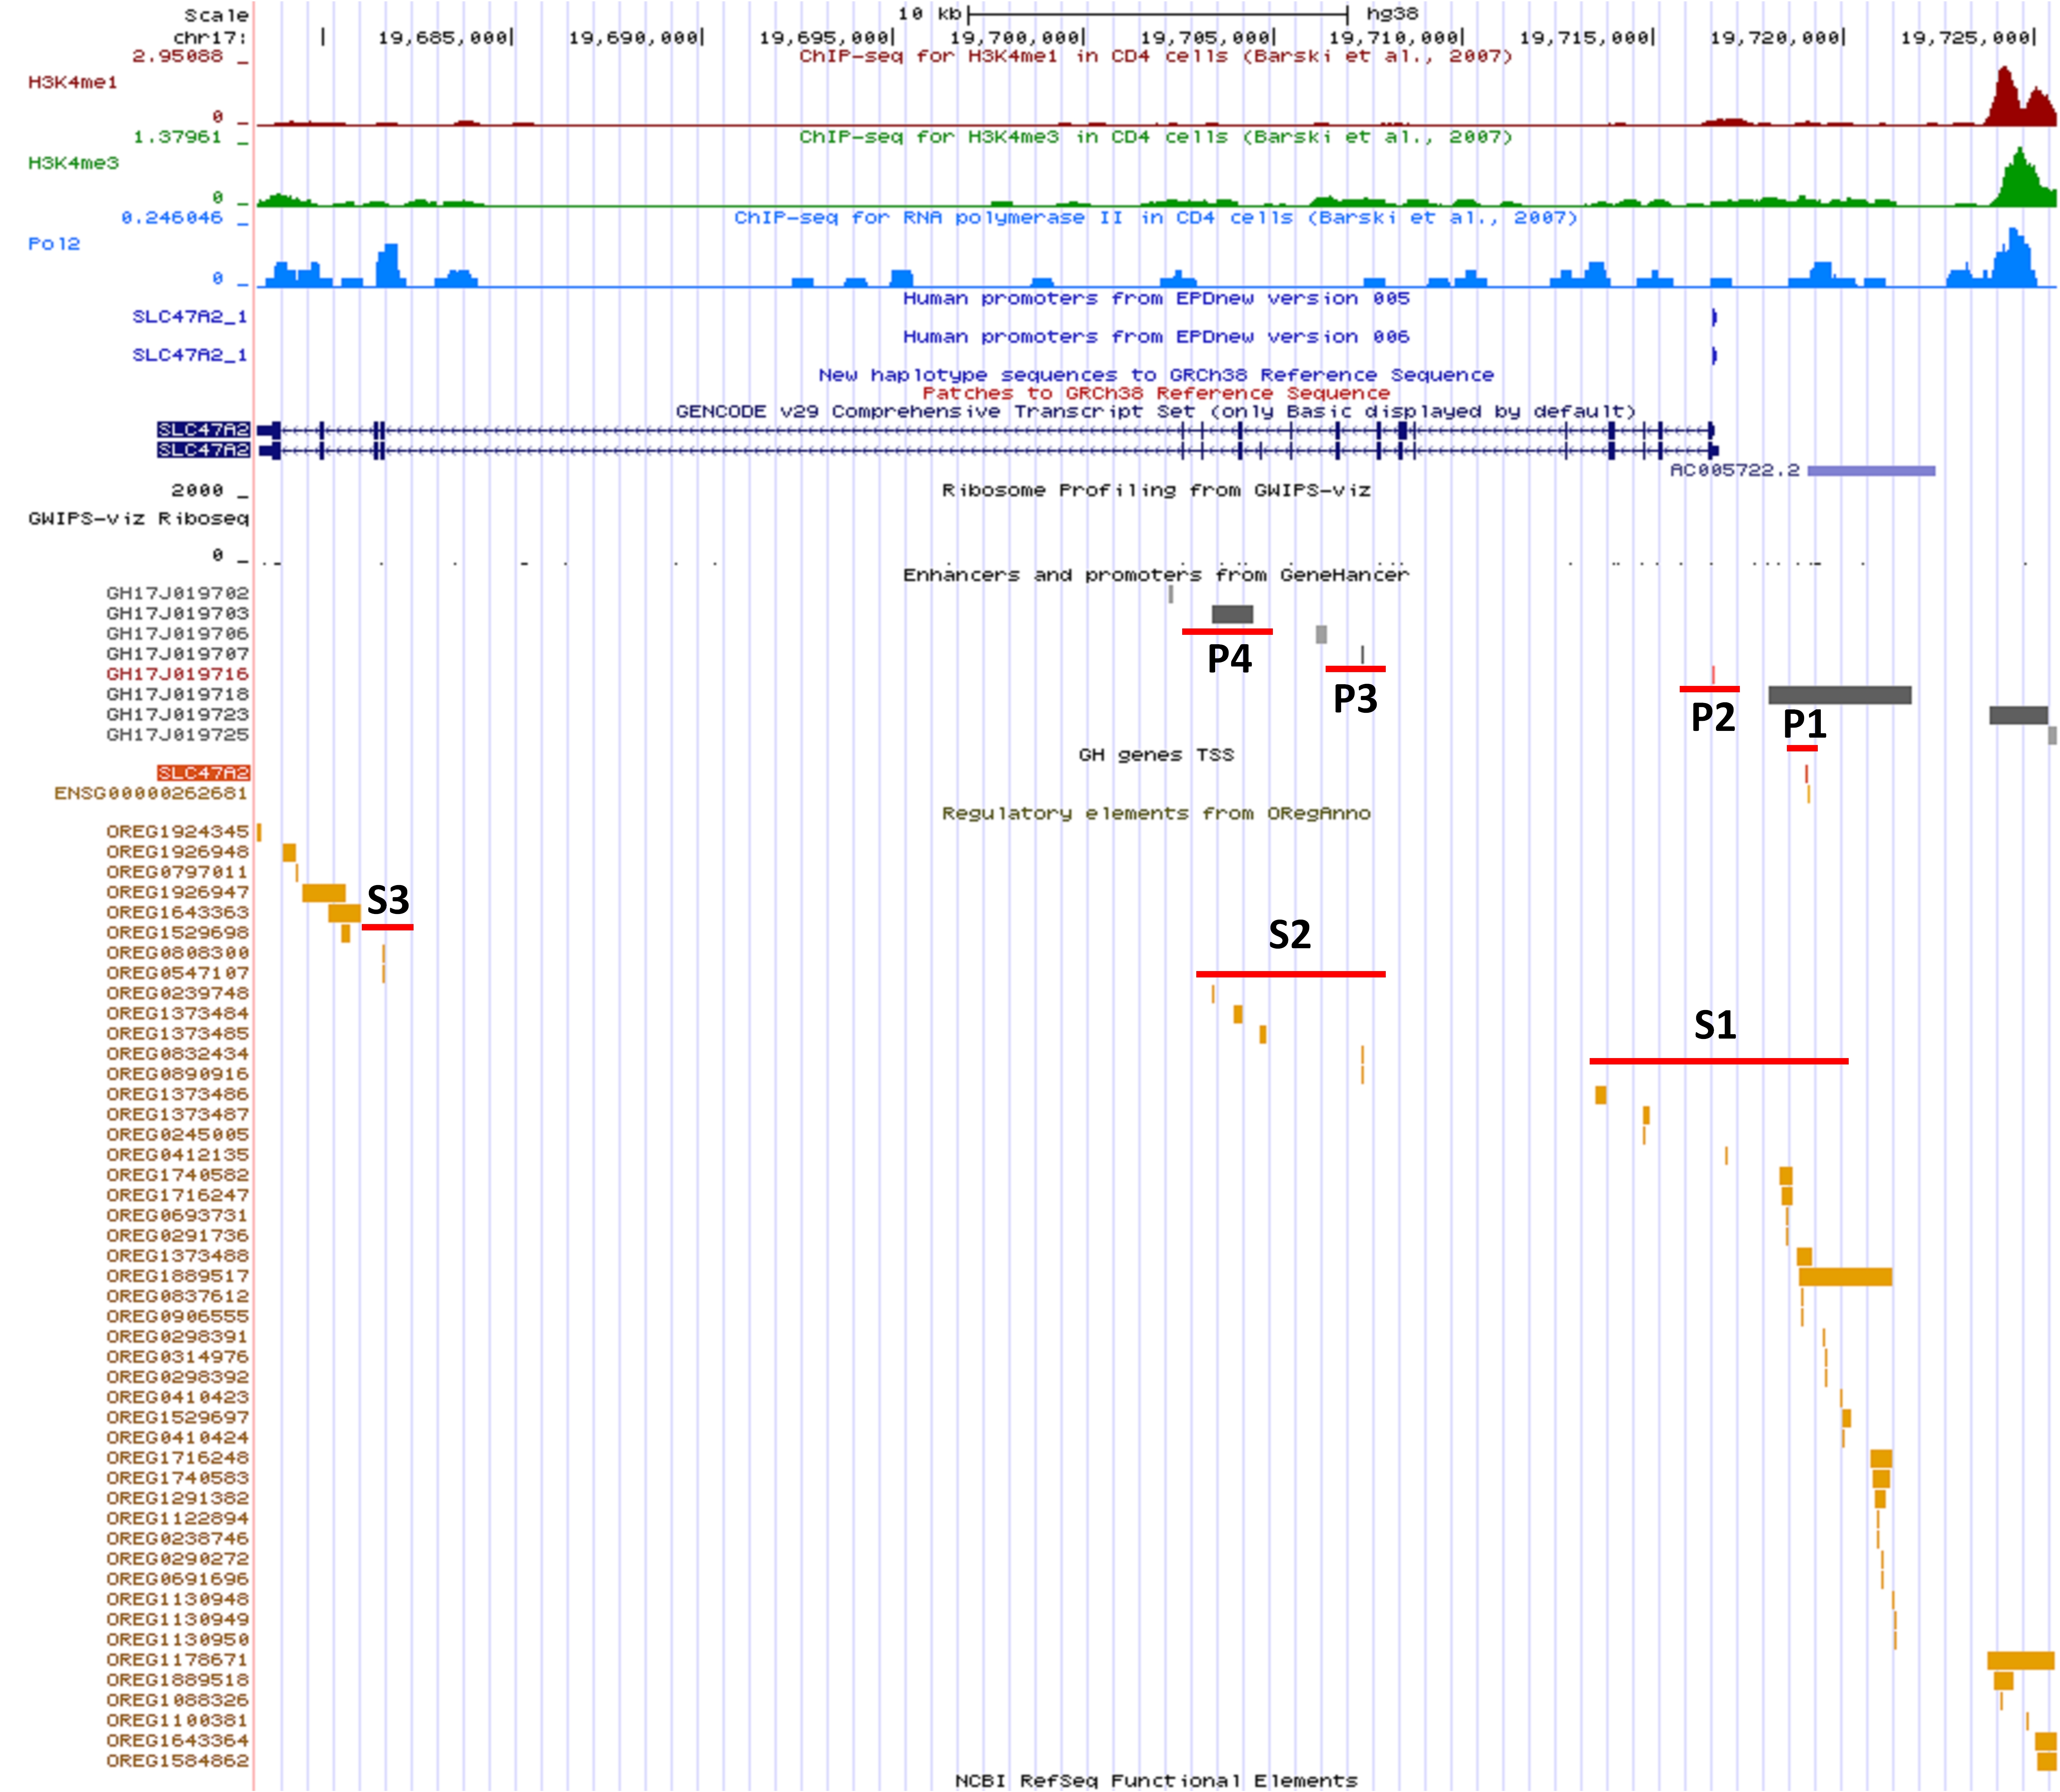


Figure S1. The annotation information of *SLC47A2* locus from the UCSC genome browser.


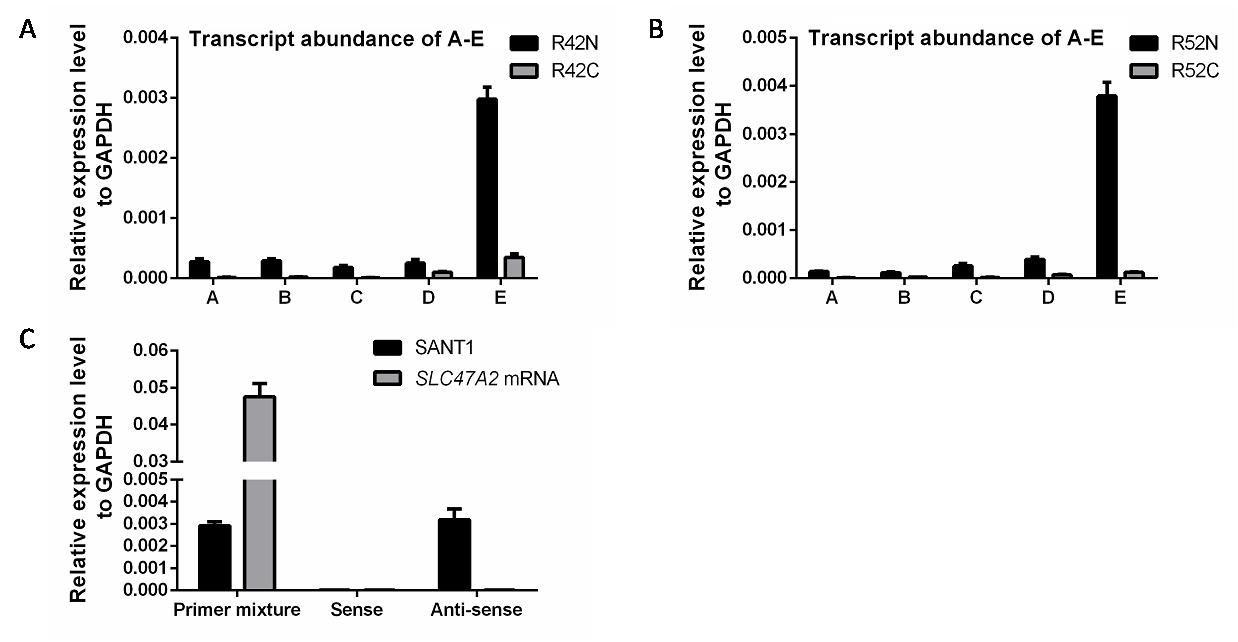


Figure S2. The transcript abundance and of strand specific qPCR of SANT1. (A) The transcript abundance of non-mRNA sequences in paired tissues. (B) The strand specific qPCR of SANT1. Total RNAs from R39N tumor-adjacent tissue (with higher SANT1 expression than RCC tissue) were reverse transcribed by Oligo dT Primer/Random 6 mers mixture, Sense or Anti-sense primer of site E, independently. The cDNAs were further amplified by site E or *SLC47A2* mRNA primer pairs, respectively.


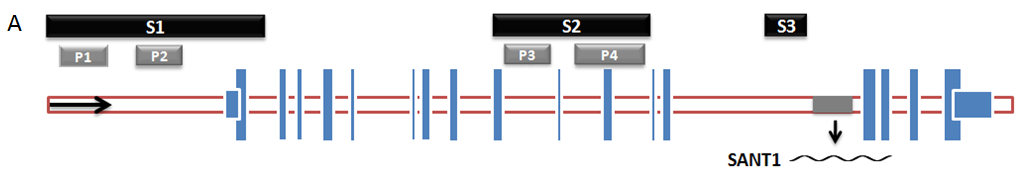


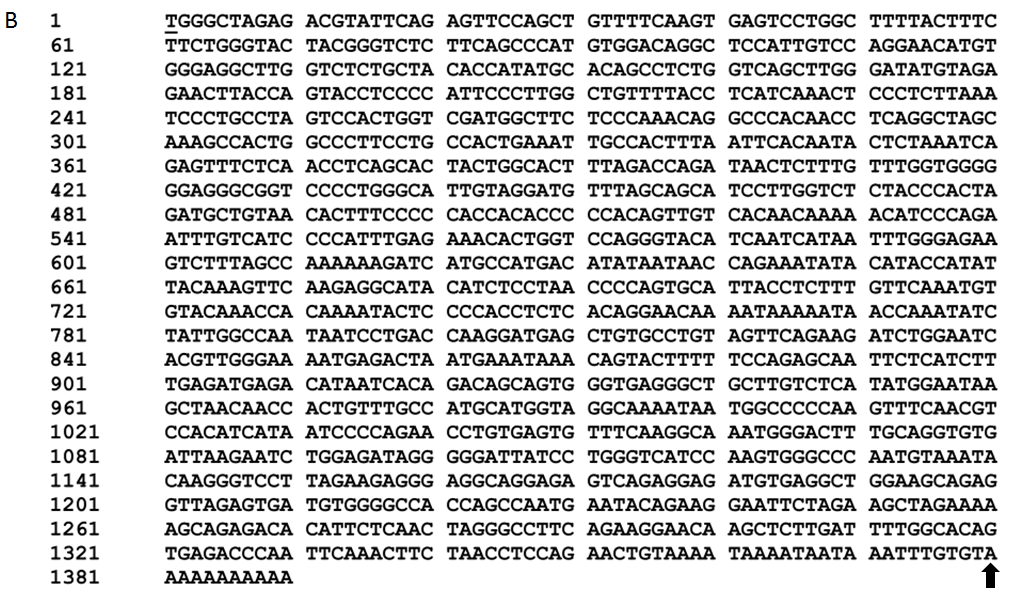


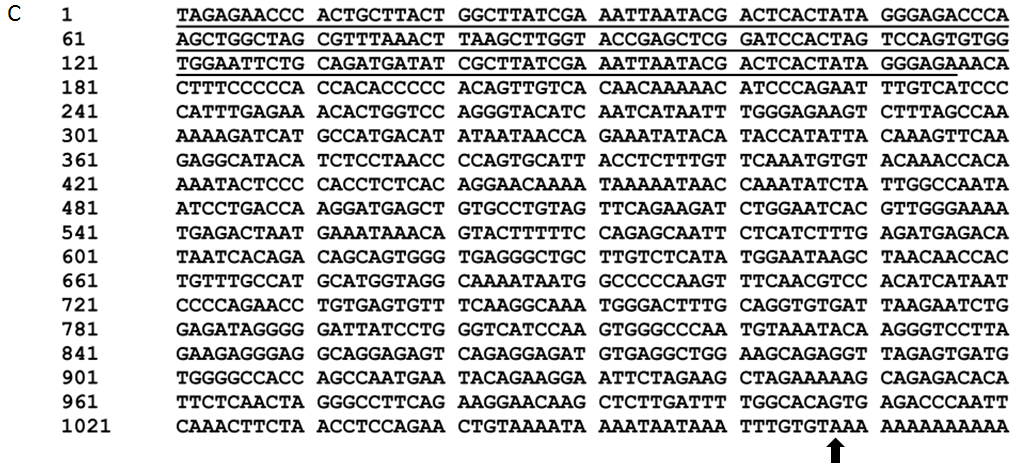


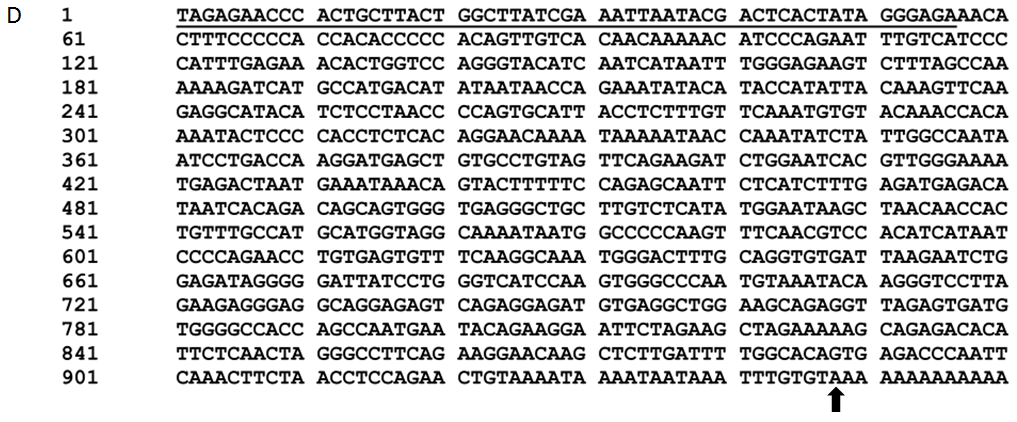


Figure S3. The sequences of SANT1 and two SANT1 mutants. (A) The location of SANT1 in *SLC47A2* gene locus, (B-D) Schematic representation of experimentally identified transcripts of SANT1 (B), SANT1-S1 (C) and SANT1-S2 (D) that transcribed by pcDNA3.1 (+). The SANT1 has a conserved polyadenylation signal, which contains two AAUAAA motifs and a GU-rich element. The SANT1s are initiation from the transcriptional start site in expression vector, and the upstream regions that transcribed from pcDNA3.1 (+) are underlined. The arrowed sites in each transcript are the first nucleotide of polyadenylation tail.


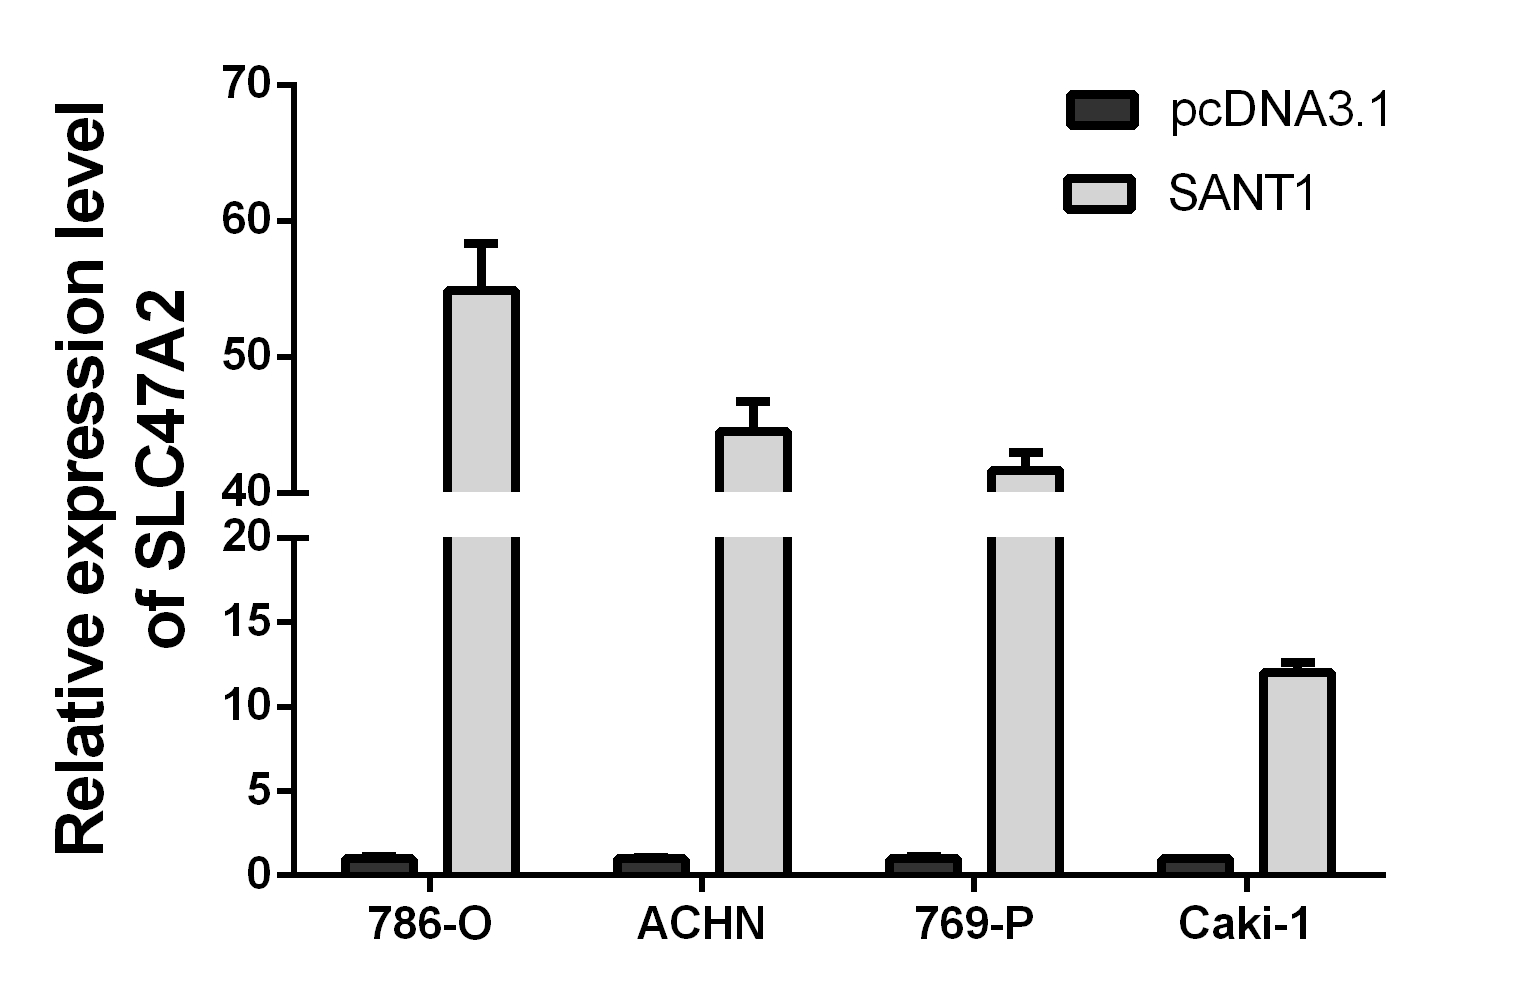


Figure S4. SANT1 upregulated the expression of *SLC47A2* mRNA at 72h.


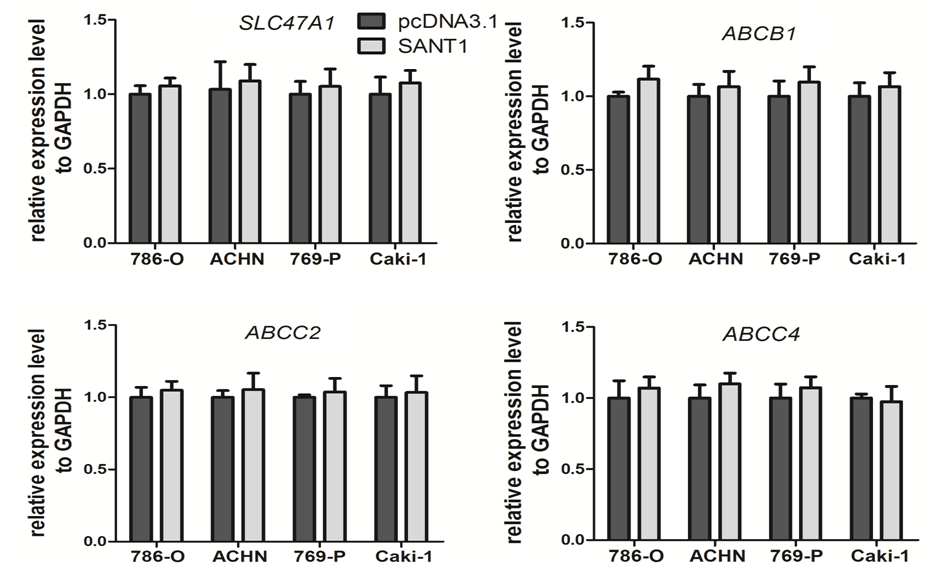


Figure S5. The abundant expression of SANT1 had no function in regulating the expression levels of *SLC47A1*, *ABCB1, ABCC2* and *ABCC4*.


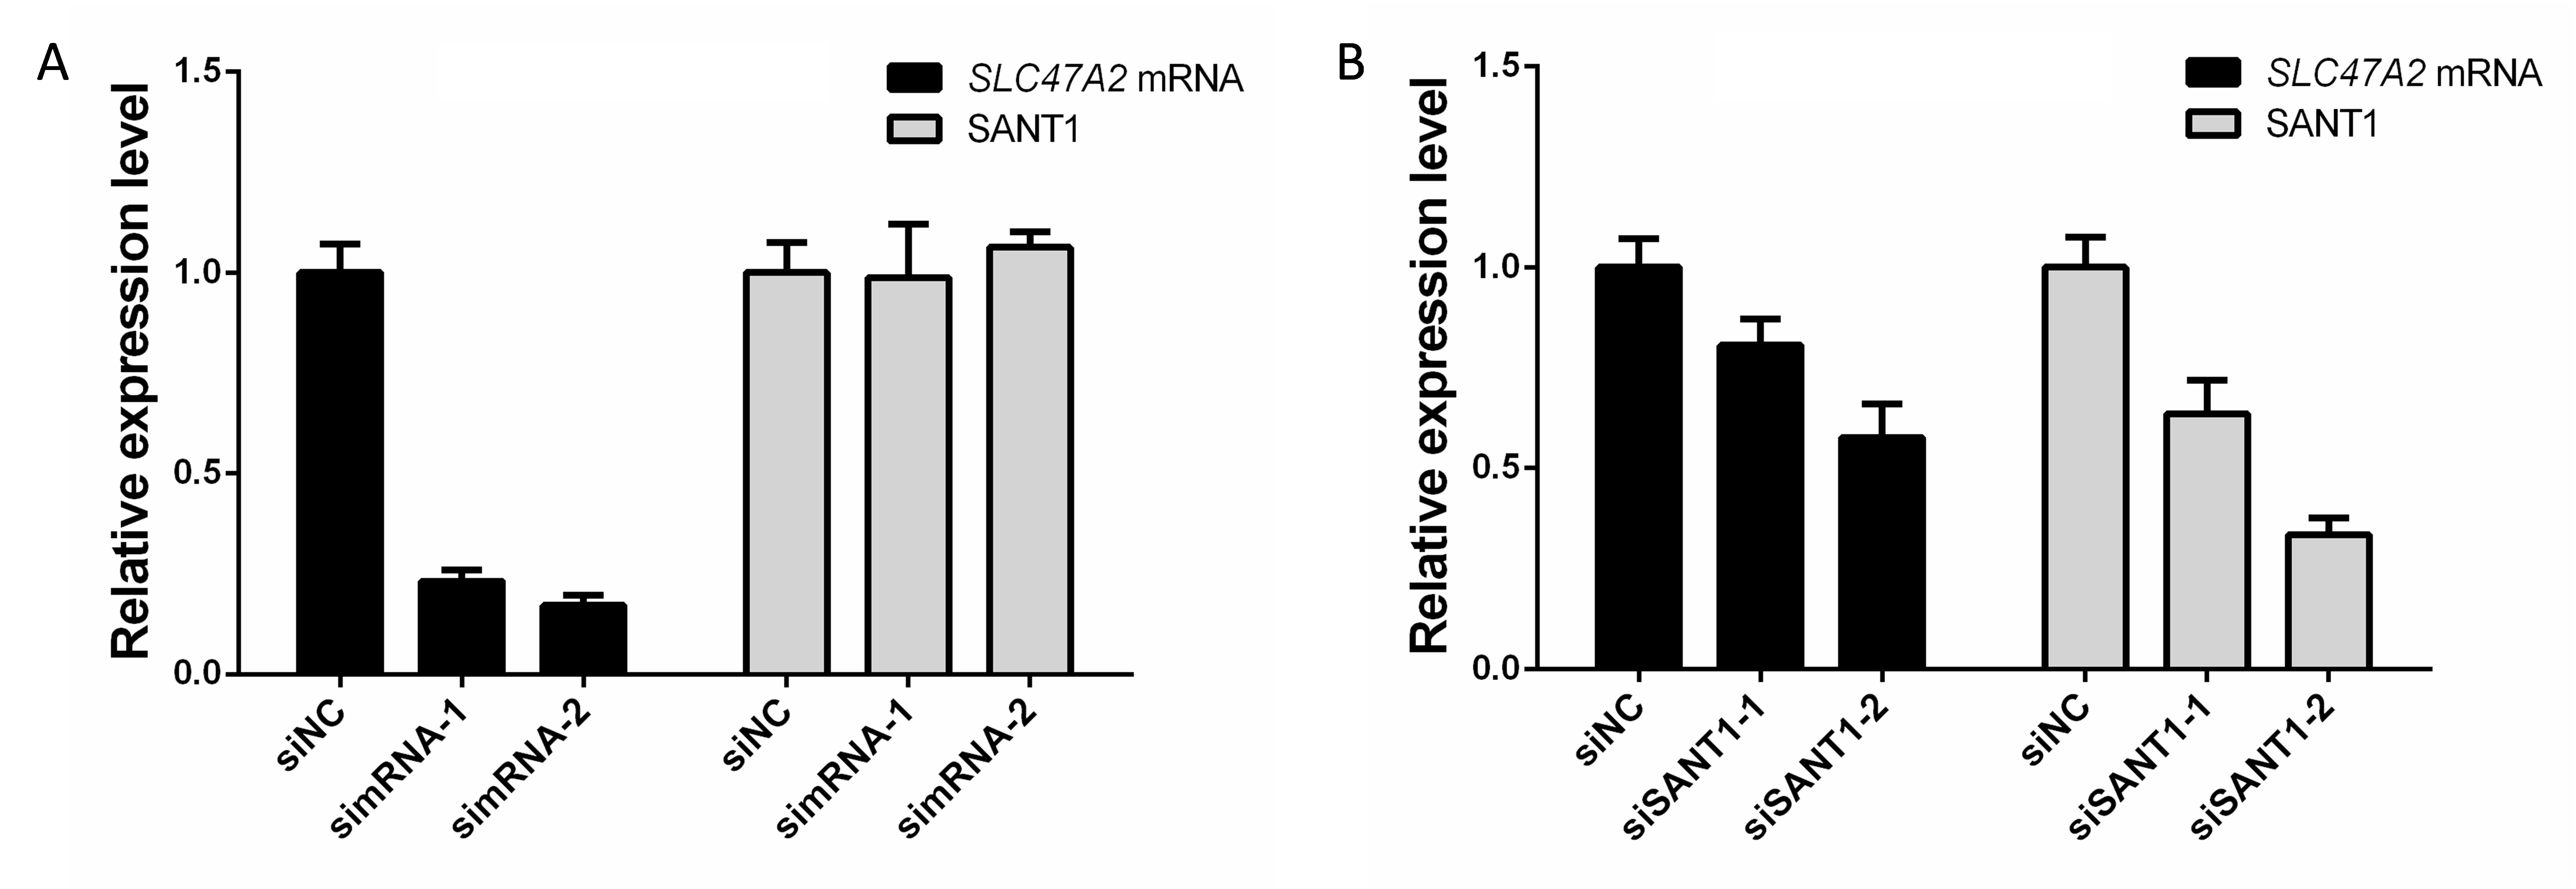


Figure S6. The simRNAs and siSANT1s targeted knockdown the expression of *SLC47A2* coding gene and SANT1, respectively. (A) The simRNAs specifically inhibited the expression of *SLC47A2* mRNA, but not SANT1. (B) The siSANT1s could knockdown the expression of SANT1, as well as *SLC47A2* mRNA.


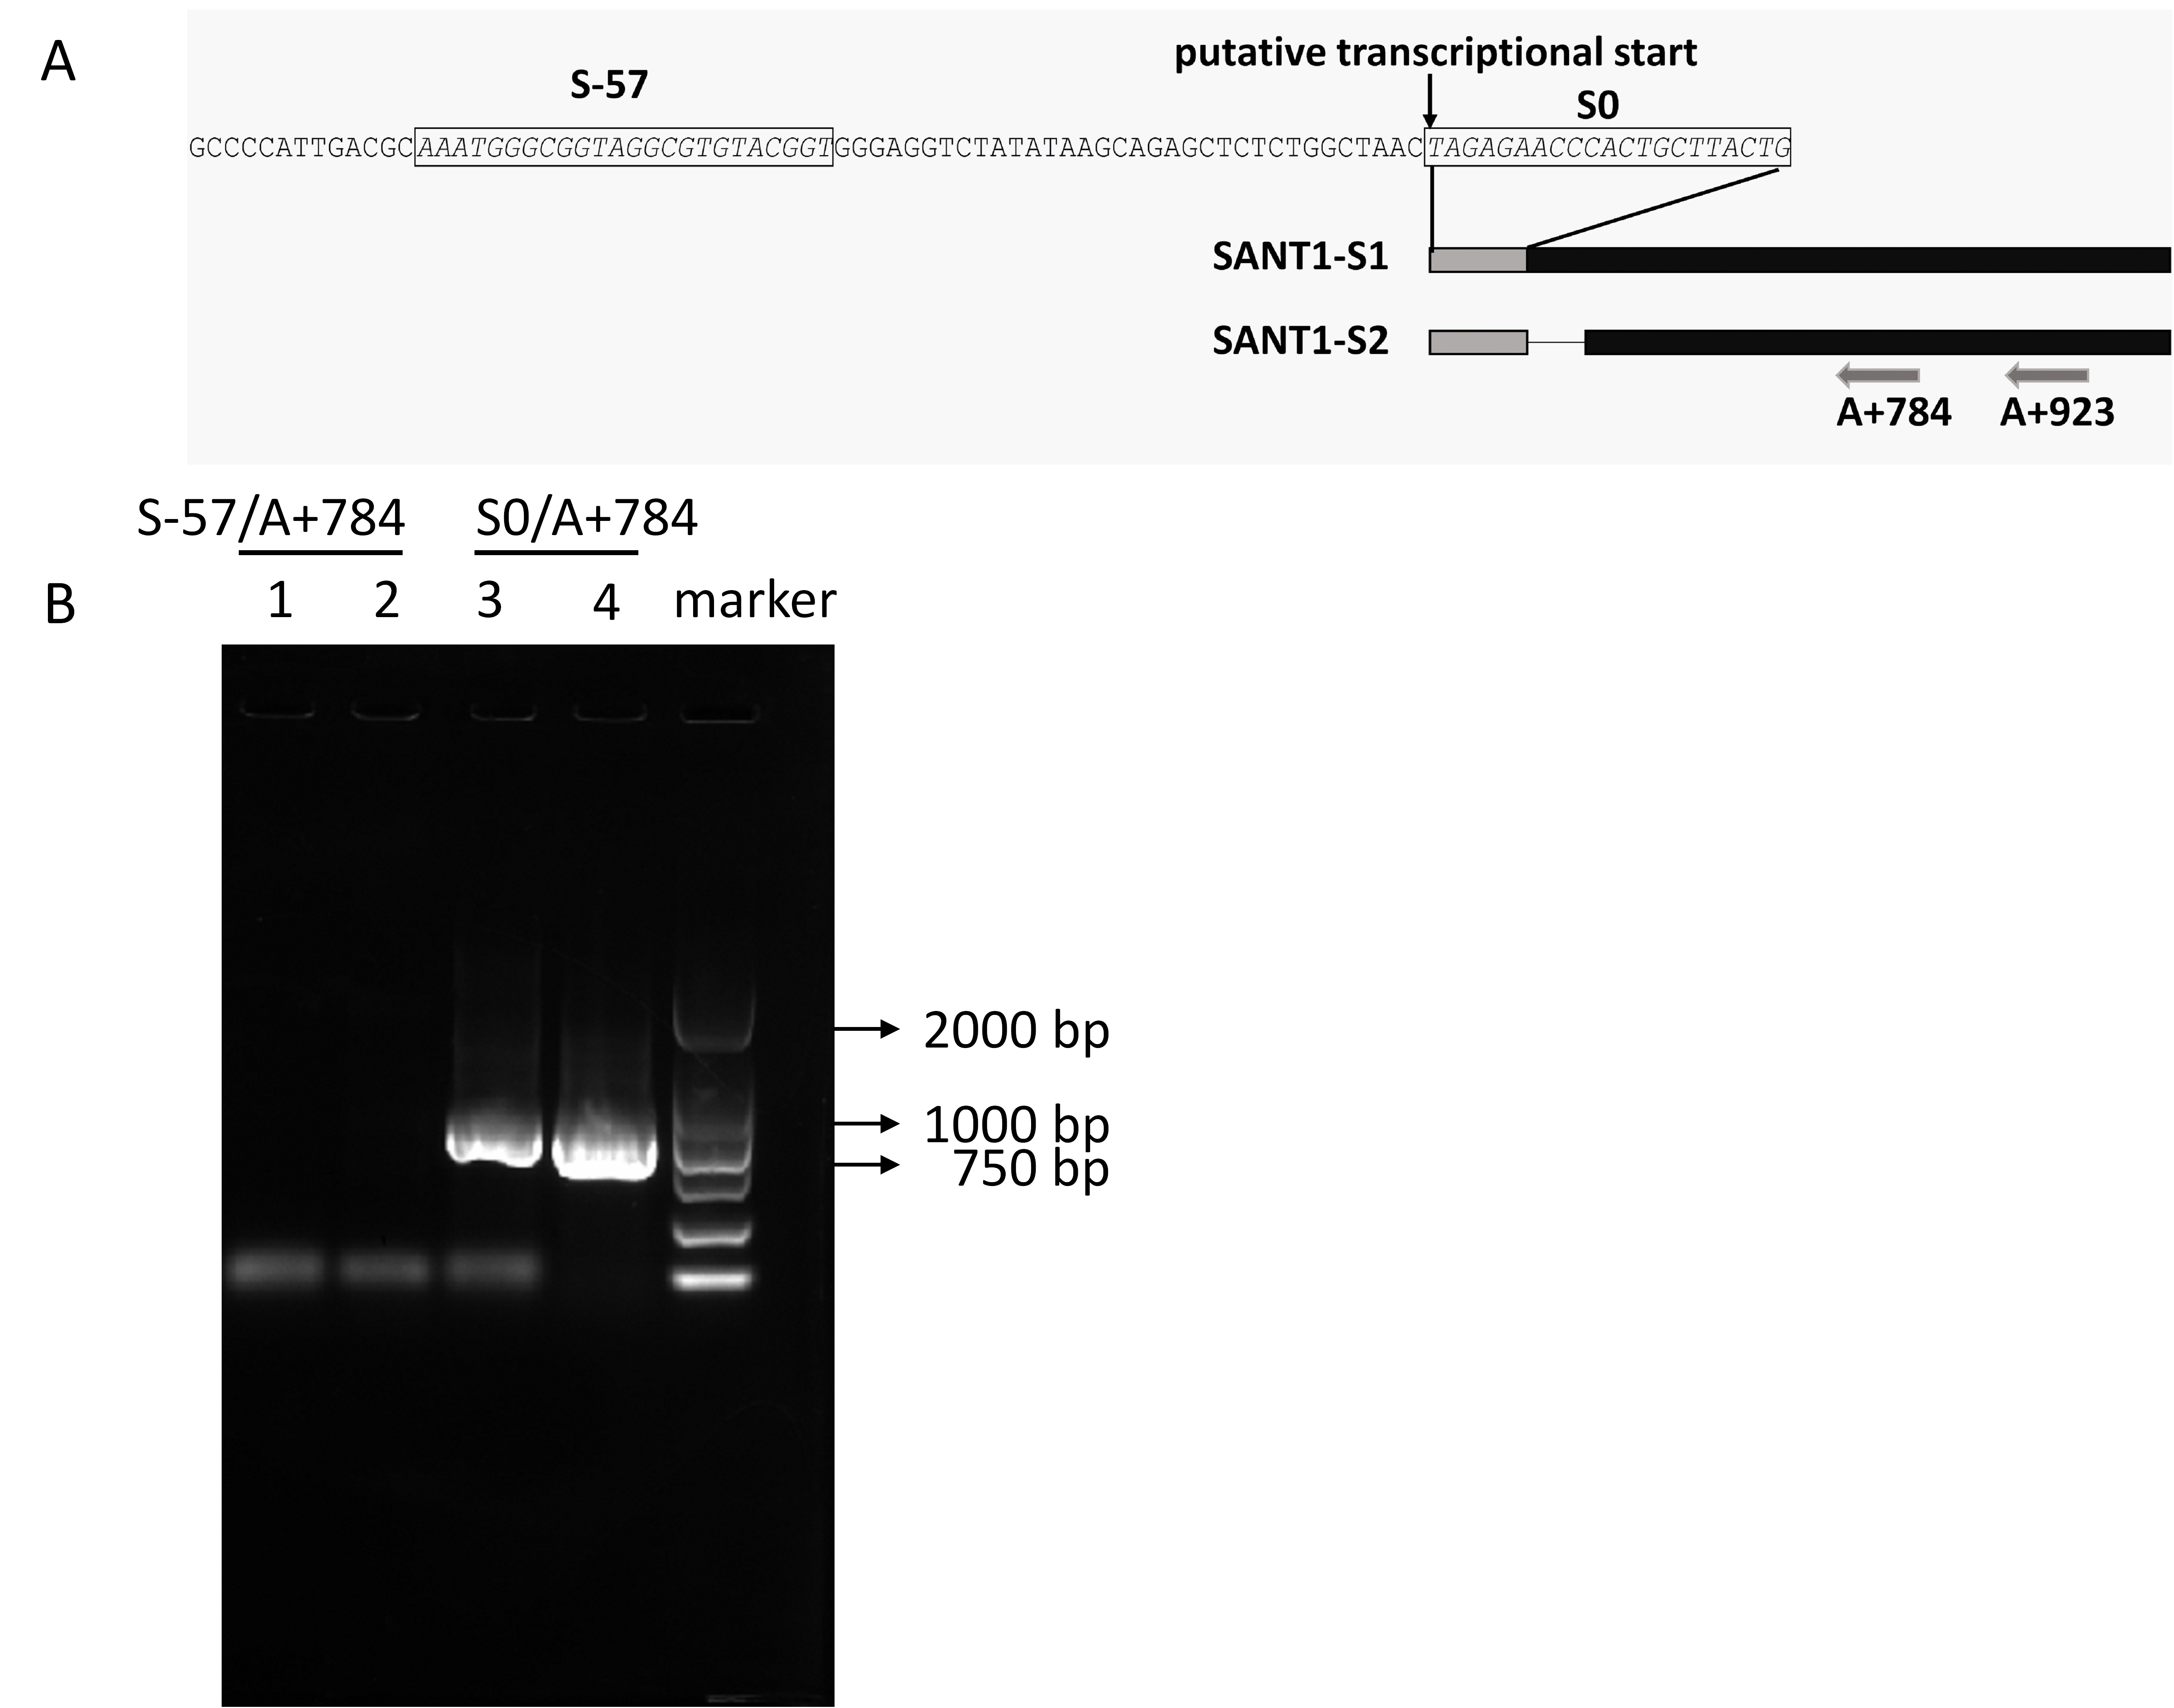


Figure S7. Analyze the rescued transcripts by PCR. The total RNAs were treated by DNase Ⅰ and reverse transcribed using the primer A923. The PCR detections were carried out using S0/A784 or S-57/A784. (A) The location of primers. (B) Lane 1: SANT1-S1 amplified by S-57/A+784; lane 2: SANT1-S2 amplified by S-57/A+784; lane 3: SANT1-S1 amplified by S0/A+784; lane 4: SANT1-S2 amplified by S0/A+784; marker: DL2000 (Takara).

Table S1. Patients' clinical information

| **Donor Number** | **Age** | **Gender** | **TNM stage** | **Subtype** |  | **Donor Number** | **Age** | **Gender** | **TNM stage** | **Subtype** |
| --- | --- | --- | --- | --- | --- | --- | --- | --- | --- | --- |
|  |
| 1 | 37 | Male | T3N0M0 | clear cell |  | 34 | 52 | Female | T1BN0M1 | clear cell |
| 3 | 66 | Female | T1N0M0 | clear cell |  | 35 | 61 | Female | T1bN0M0 | clear cell |
| 4 | 70 | Female | T4N0M0 | clear cell |  | 36 | 58 | Female | T1aN0M0 | clear cell |
| 6 | 64 | Female | T1N0M0 | clear cell |  | 37 | 43 | Female | T1aN0M0 | clear cell |
| 7 | 52 | Female | T1N0M0 | clear cell |  | 38 | 63 | Female | T1aN0M0 | clear cell |
| 8 | 50 | Male | T1N0M0 | papillary |  | 39 | 66 | Male | T1N0M0 | clear cell |
| 9 | 60 | Male | T1N0M0 | clear cell |  | 40 | 50 | Female | T1N0M0 | clear cell |
| 10 | 62 | Male | T1N0M0 | clear cell |  | 41 | 47 | Male | T1N0M0 | clear cell |
| 11 | 70 | Male | T3N0M0 | clear cell |  | 42 | 44 | Female | T1N0M0 | clear cell |
| 13 | 60 | Male | T1N0M0 | clear cell |  | 43 | 49 | Male | T3N0M0 | clear cell |
| 14 | 47 | Male | T1N0M0 | clear cell |  | 44 | 51 | Male | T1N0M0 | unclassified |
| 15 | 49 | Female | T1N0M0 | clear cell |  | 45 | 44 | Female | T1N0M0 | clear cell |
| 16 | 56 | Male | T3N0M0 | clear cell |  | 46 | 48 | Male | T1N0M0 | clear cell |
| 17 | 47 | Female | T2N0M0 | clear cell |  | 47 | 56 | Male | T2N2M0 | clear cell |
| 18 | 67 | Male | T1N0M0 | clear cell |  | 49 | 42 | Male | T4N0M0 | clear cell |
| 19 | 57 | Male | T2N0M0 | clear cell |  | 52 | 63 | Female | T1N0M0 | unclassified |
| 20 | 37 | Female | T2N0M0 | clear cell |  | 53 | 27 | Female | T2N0M0 | chromophobe |
| 21 | 60 | Male | T1N0M0 | clear cell |  | 54 | 45 | Female | T4N2M0 | clear cell |
| 22 | 44 | Male | T1N0M0 | clear cell |  | 55 | 63 | Female | T4N2M1 | clear cell |
| 23 | 54 | Male | T1N0M0 | clear cell |  | 56 | 62 | Male | T3aN2M0 | clear cell |
| 24 | 49 | Male | T1N0M0 | clear cell |  | 57 | 61 | Male | T3aN0M0 | unclassified |
| 25 | 52 | Male | T1N0M0 | unclassified |  | 58 | 55 | Female | T1N0M0 | clear cell |
| 26 | 48 | Female | T1N0M0 | clear cell |  | 59 | 66 | Male | T4N0M0 | papillary |
| 27 | 41 | Male | T1N0M0 | clear cell |  | 61 | 65 | Male | T3aN0M0 | papillary |
| 29 | 42 | Male | T1N0M0 | clear cell |  | 62 | 49 | Male | T1aN0M0 | clear cell |
| 30 | 63 | Male | T1N0M0 | clear cell |  | 63 | 72 | Male | T1aN0M0 | unclassified |
| 32 | 61 | Female | T1N1M0 | papillary |  | 64 | 45 | Female | T1bN0M0 | clear cell |
| 33 | 71 | Female | T1BN0M0 | clear cell |  |  |  |  |  |  |

Table S2. The primer sequences

| **For ChIP** | **Sense** | **Anti-sense** | | |
| --- | --- | --- | --- | --- |
| GAPDH promoter | TACTAGCGGTTTTACGGGCG | TCGAACAGGAGGAGCAGAGAGCGA | | |
| P1 | CTGAAGAAGCTGCACCTGGAGACGT | TGCACCTCCTCCAACAGGCTCTAC | | |
| P2 | CAGGAATGAGGTGGGCAAGCA | GGCCCACCACTCAACACAGATCAT | | |
| P3 | CTGGCCAACATGGCGAAAC | GCTGGAGTGCAGTGGCGCAATTATA | | |
| P4 | AGACACAGCCATCGTCTTGCTTATG | CGGTTTTTGTGACTCCTTTGCTTAA | | |
| -4500 | GGCGCCTCAGGGATTTAGCAGTTGT | AAAGGACAGTTGGGGAGGATTGAGC | | |
| -3781 | CAGCTGATAGCAGGCACCCAC | CCCTAGTCTAGCTGTGTCTGCAGTC | | |
| -2624 | GACAGCATTGGAAGCTCTGGAG | GGAACCTGAGATACTTTGAGCGG | | |
| -1388 | AAGAGGTAGGCTGACCATGAGAACT | GATGACACCAAACAGGAGGAAGTAC | | |
| -4450 (SFPQ/E2F1 binding) | AGGGATTTAGCAGTTGTTGGTCAC | AAGGACAGTTGGGGAGGATTGA | | |
| -3100 (E2F1 binding) | TAAGCTGATAGCAGGCACCCAC | TCATGAGTCTGTGCGGCGA | | |
| -2300 (E2F1 binding) | GACTGAAGGGTGGCATGTTGC | ATACTTTGAGCGGAGCTGCACAT | | |
| -1400 (E2F1 binding) | TTCAGGAGGATTTGCGGCTG | CCTAGAGGAAAGAAGACATTTTATCACCA | | |
| -70 (E2F1 binding) | AGTCACTGTGGGCACCATCAC | TGGCAACTTGTGGGATGAGC | | |
| **For Real-Time PCR** | **Sense** | **Anti-sense** | | |
| Site A | CTGAAGCTATCTCTGTCTCCCGAAG | CCTGTGTGTGAGTCCTGGCGTA | | |
| Site B | ATGGCTGTGCTTTCTGAGACTGG | GCATCTGAGGCGTTCATTTGG | | |
| Site C | GTGGTTCCCAGTGTGTCCTCA | CCCTTCAATTAGCCTCTTGTCTATG | | |
| Site D | GGTAGTATCACTCCTCCAACATCGC | GAAAGGAAAAGCCATCCAGCAGC | | |
| Site E | TTACTTTCTTCTGGGTACTACGGGT | CAGTGGACTAGGCAGGGATTTAA | | |
| GAPDH mRNA | AAGGGCATCCTGGGCTACACT | CCTGTTGCTGTAGCCAAATTCGT | | |
| *SLC47A2* mRNA | GCTGCCTTTGTTGCTTATACTGC | GGATGACCAGCTGTTTCACTGATAG | | |
| **For Plasmids Construction** | | | | |
| mRNA-S | TTA*GGTACC*AGTGCCCTAGGAGGCAGGGCT | | | |
| mRNA-A | TTA*TCTAGA*TGCCCAGGAAATGTGTAATCTTTAATATAACAGT | | | |
| SANT1-S | GCA*GAGCTC*TCTGGCTAACTGGGCTAGAGACGT | | | |
| SANT1-A | TTT*CTCGAG*ACACAAATTTATTATTTTATTTTACAGT | | | |
| SANT1-S1 | T*GATATC*GCTTATCGAAATTAATACGACTCACTATAGGGAGAAACACTTTCCCCCACCA | | | |
| SANT1-A1 | TTT*GATATC*ACACAAATTTATTATTTTATTTTACAGT | | | |
| SANT1-S2 | GCA*GAGCTC*TCTGGCTAACTAGAGAACCCACTGCTTACTGGCTTATCGAAAT | | | |
| SANT1-A2 | ATGGTGATGATG*TCTAGA*CTCGAGC | | | |
| S0 | TAGAGAACCCACTGCTTACTG | | | |
| S-57 | AAATGGGCGGTAGGCGTGTACGGT | | | |
| A+784 | CTATCTCCAGATTCTTAATCACACCTG | | | |
| A+923 | TCTGTATTCATTGGCTGGTGGC | | | |
| **For RACE** | | | | |
| NUP | AAGCAGTGGTATCAACGCAGAGT | | | |
| 3-AD | AAGCAGTGGTATCAACGCAGAGTACTTTTTTTTTTTTTTTTVN | | | |
| 3RACE-S1 | ATCCATGTGTGGGCTAGAGACGTAT | | | |
| 3RACE-S2 | GCTGTTTTACCTCATCAAACTCCCTCTTA | | | |
| 3RACE-S3 | CTCTTAAATCCCTGCCTAGTCCACT | | | |
| 5-AD | AAGCAGTGGTATCAACGCAGAGTAGGGGGGGGGGH | | | |
| 5RACE-A1 | GGAAAGTGTTACAGCATCTAGTG | | | |
| 5RACE-A2 | GTGCTGAGGTTGAGAAACTCTGATTTAGAG | | | |
| 5RACE-A3 | AGAGTATTGTGAATTAAAGTGGCAATTTC | | | |
| 5RACE-A4 | GGCAATTTCAGTGGCAGGAAGG | | | |
| 5RACE-A5 | CAGTGGACTAGGCAGGGATTTAA | | | |
| **For CLIP** | | | | |
| ASO-1 | Biotin 5’-AGGATTATTGGCCAATAGATATTTGGTTATT-3’ | | |  |
| ASO-2 | Biotin 5’-GAACAAAGAGGTAATGCACTGGGGTT-3’ | |  | |
| **siRNA** | | | | |
| siNC | UUCUCCGAACGUGUCACGUdTdT | | | |
| simRNA-1 | CUGCUGCCUUUGUUGCUUAdTdT | | | |
| simRNA-2 | GUUCUGGUCAAGCUGGAGUUdTdT | | | |
| siSANT1-1 | GAGGCAUACAUCUCCUAACdTdT | | | |
| siSANT1-2 | GCCACCAGCCAAUGAAUACdTdT | | | |

Table S3. The interactions between SANT1s and proteomes.

| **Transcript** | **NO.** | **Protein** | **Z-score** | **Discriminative Power** | **Interaction Strength** | **RPISeq score** | **Transcriptional regulation** |
| --- | --- | --- | --- | --- | --- | --- | --- |
| SANT1 | 1 | LN28B |  | | | | NO |
| 2 | SFPQ | YES |
| 3 | SRSF9 | YES |
| 4 | KHDR3 | NO |
| 5 | SRSF2 | YES |
| SANT1-S1 | 1 | SFPQ | 3 | 100 | 94 | 95 | Yes |
| 2 | ESRP2 | 2.17 | 99 | 88 | 90 | No |
| 3 | NOVA2 | 1.03 | 97 | 95 | 93 | No |
| 4 | PTBP1 | 1.04 | 97 | 68 | 92 | No |
| 5 | KHDR3 | 0.75 | 95 | 87 | 92 | No |
| 6 | U2AF2 | 0.5 | 90 | 90 | 91 | No |
| 7 | CELF1 | 0.43 | 87 | 86 | 89 | No |
| 8 | PCBP1 | 0.25 | 77 | 81 | 88 | No |
| SANT-S2 | 1 | SFPQ | 0.24 | 77 | 24 | 90 | Yes |

The Discriminative Powers above 75% represent high-confidence predictions.

The Strength values above 50% indicate high specificity for the interaction.

(http://service.tartaglialab.com/static_files/shared/faqs.html)
